# Supplementary material
Source: Springer Nature journal article supplement (https://www.springermedizin.de/resource/supplementary/12962_2009_122_MOESM6_ESM.pdf/9572206)
Supplement: MOESM6 [file 9572206]

Is there comparison of two or more alternatives?

|            |  | <b>No</b>                                                     |                            | <b>Yes</b>                                                                                                                                                  |
|------------|--|---------------------------------------------------------------|----------------------------|-------------------------------------------------------------------------------------------------------------------------------------------------------------|
|            |  | <i>Examines only effects</i>                                  | <i>Examines only costs</i> |                                                                                                                                                             |
| <b>No</b>  |  | 1A Partial evaluation<br>Outcome description                  | 1B<br>Cost description     | 2 Partial evaluation<br>Cost-outcome description                                                                                                            |
| <b>Yes</b> |  | 3A Partial evaluation<br>Efficacy or effectiveness evaluation | 3B<br>Cost analysis        | 4 Full economic evaluation<br>Cost-minimization analysis<br>Cost-effectiveness analysis (CEA)<br>Cost-utility analysis (CUA)<br>Cost-benefit analysis (CBA) |

Are both costs (inputs) and consequences (outputs) of the alternatives examined?
